# Supplementary material for: Retinal oxygen supply shaped the functional evolution of the vertebrate eye
Source: eLife journal article supplement (doi:10.7554/elife.52153), 2019-12-09

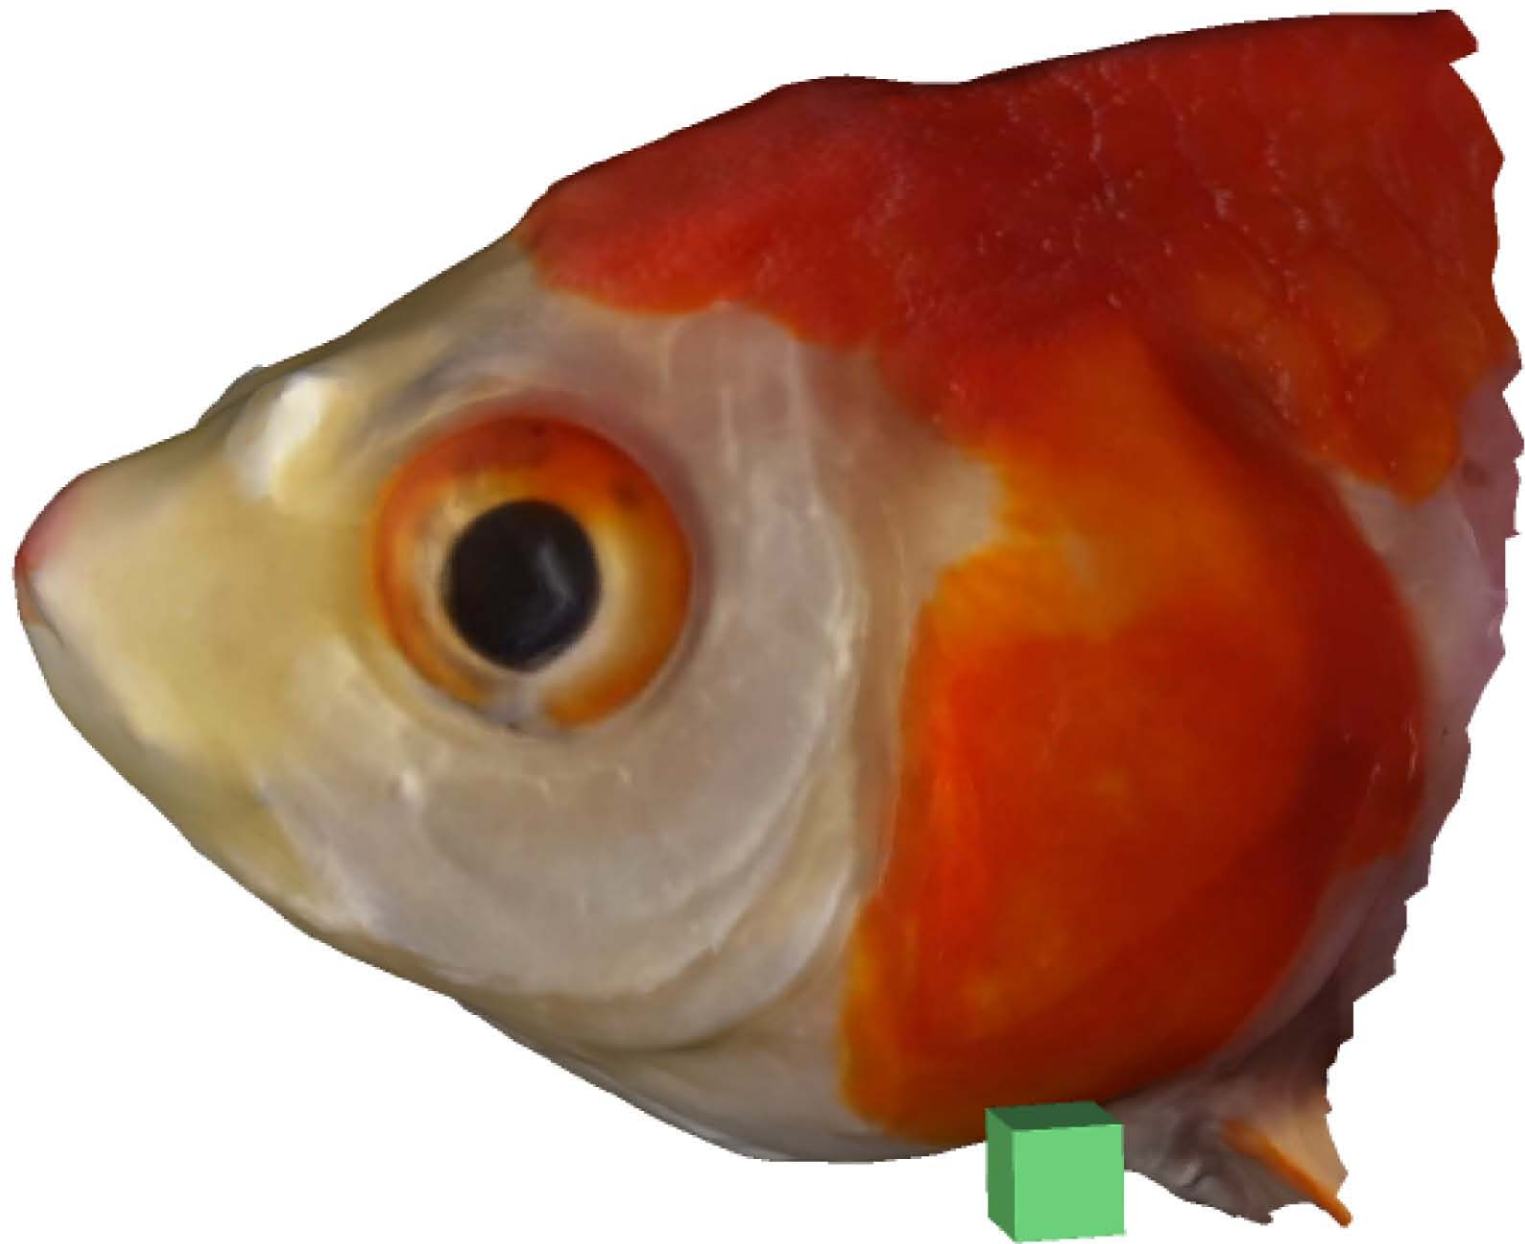

Supplement: supp4 [file elife-52153-supp4-v1.pdf]
